# Supplementary material for: Gamma-interferon exerts a critical early restriction on replication and dissemination of yellow fever virus vaccine strain 17D-204
Source: PubMed Central journal article supplement (PMC5780476; doi:10.1038/s41541-017-0039-z), 2018-01-23
Supplement: 41541_2017_39_MOESM1_ESM.pdf [file 41541_2017_39_MOESM1_ESM.pdf]

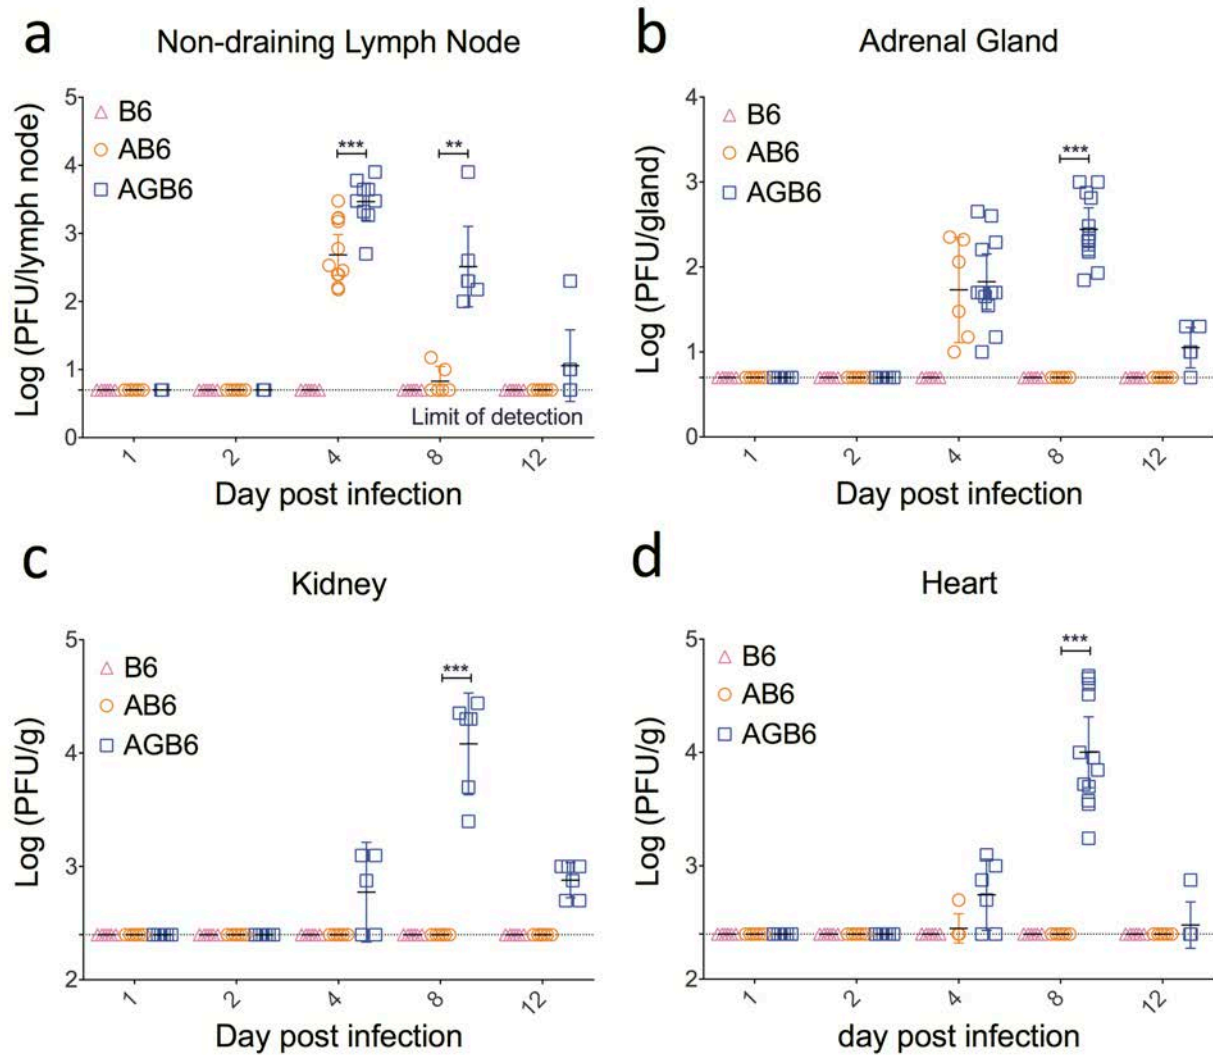

**Supplemental figure 1.** *In vivo* growth kinetics for 17D-204 in AB6 and AGB6 mice. Various tissues from 17D-204-infected mice were harvested at various time post-infection. Tissues were homogenized, and virus titers were quantified with standard plaque assay on Huh7. (a) Non-draining (mesenteric) lymph node, (b) adrenal gland, (c) kidney, (d) heart. Data are presented in geometric mean  $\pm$  95% CI. n=6, 1 out of 3 independent experiment is shown. (\*:  $p < 0.05$ ; \*\*  $p < 0.01$ ; \*\*\*  $p < 0.005$ ; \*\*\*\*  $p < 0.001$ ; multiple t-test, corrected by Holm-Sidak method.)

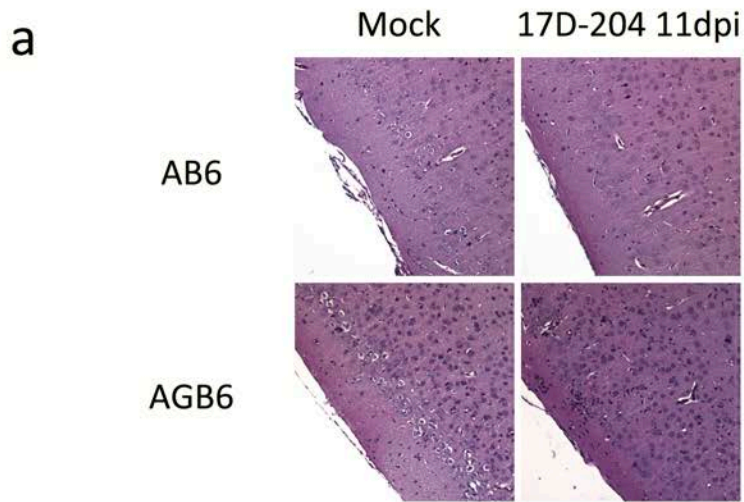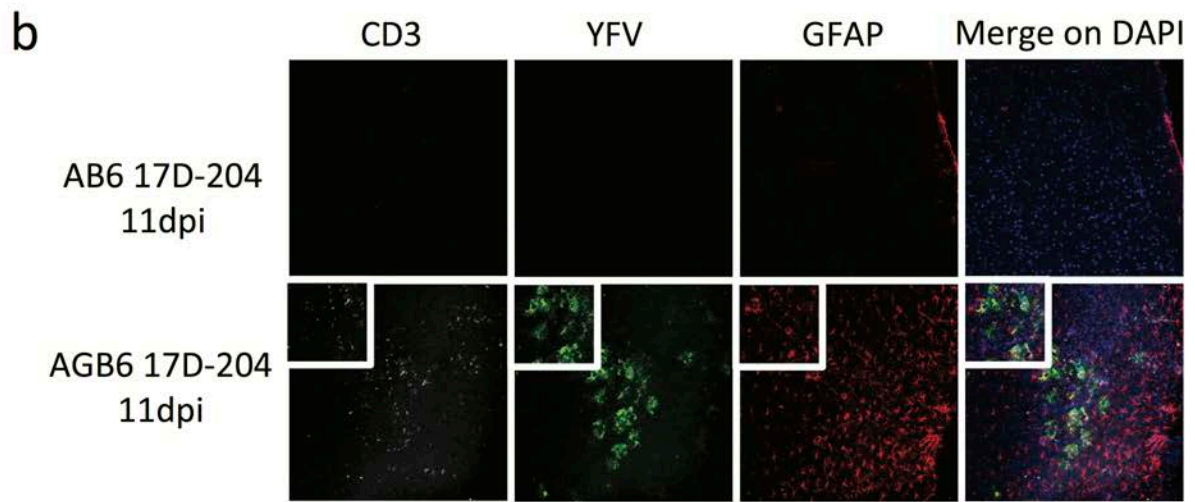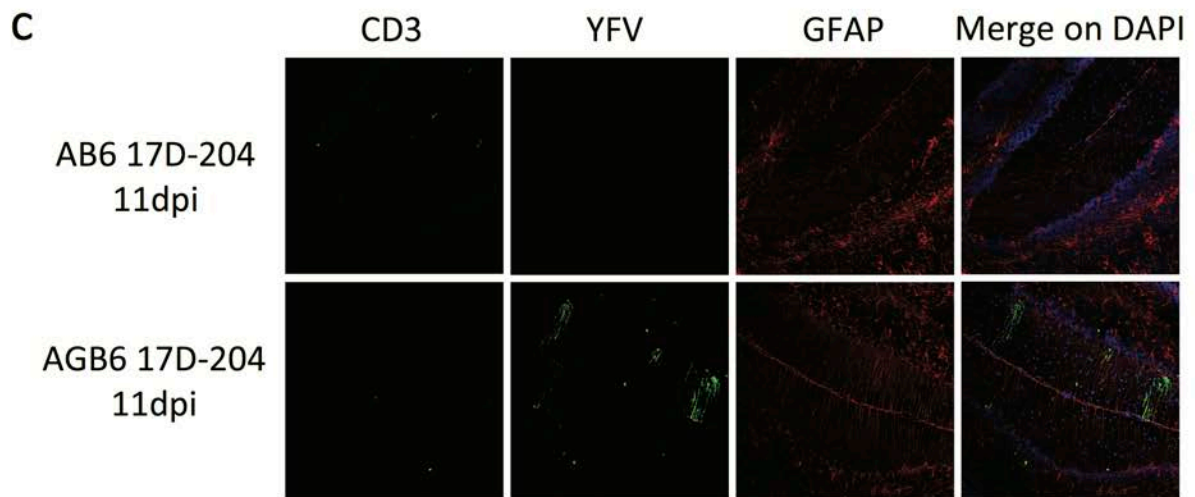

**Supplemental figure 2.** Inflammation and viral antigens in brains of 17D-204-infected AGB6 mice. In H&E stained brain sections (a), 17D-204-infected AGB6 mice but not AB6 or mock-infected animals had increase cellular infiltration to the cerebral cortex at 11dpi. Concomitantly, YFV antigens can be detected in (b) cerebrum and (c) cerebellum. n=4, original magnification: (a-c) 20x, inset in (b) 40x.

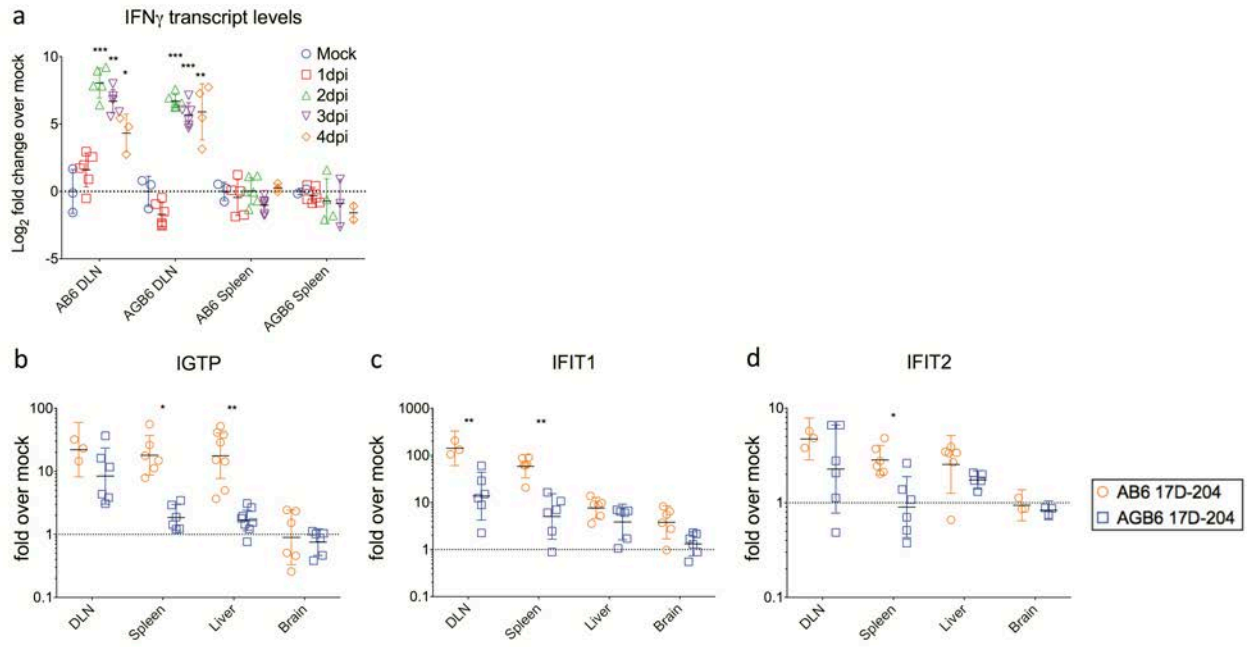

**Supplemental figure 3.** IFN- $\gamma$  is produced early locally at draining lymph node but its downstream antiviral effect is widespread. (a) Kinetics of IFN- $\gamma$  induction from 1-4dpi. (b-d) Expression of antiviral genes on 4dpi. Data are presented in geometric mean  $\pm$  95% CI. (\*:  $p < 0.05$ , \*\*  $p < 0.01$ , \*\*\*  $p < 0.005$ , \*\*\*\*  $p < 0.001$ ). (a)  $n \geq 5$ . (b-d)  $n = 3-6$ .

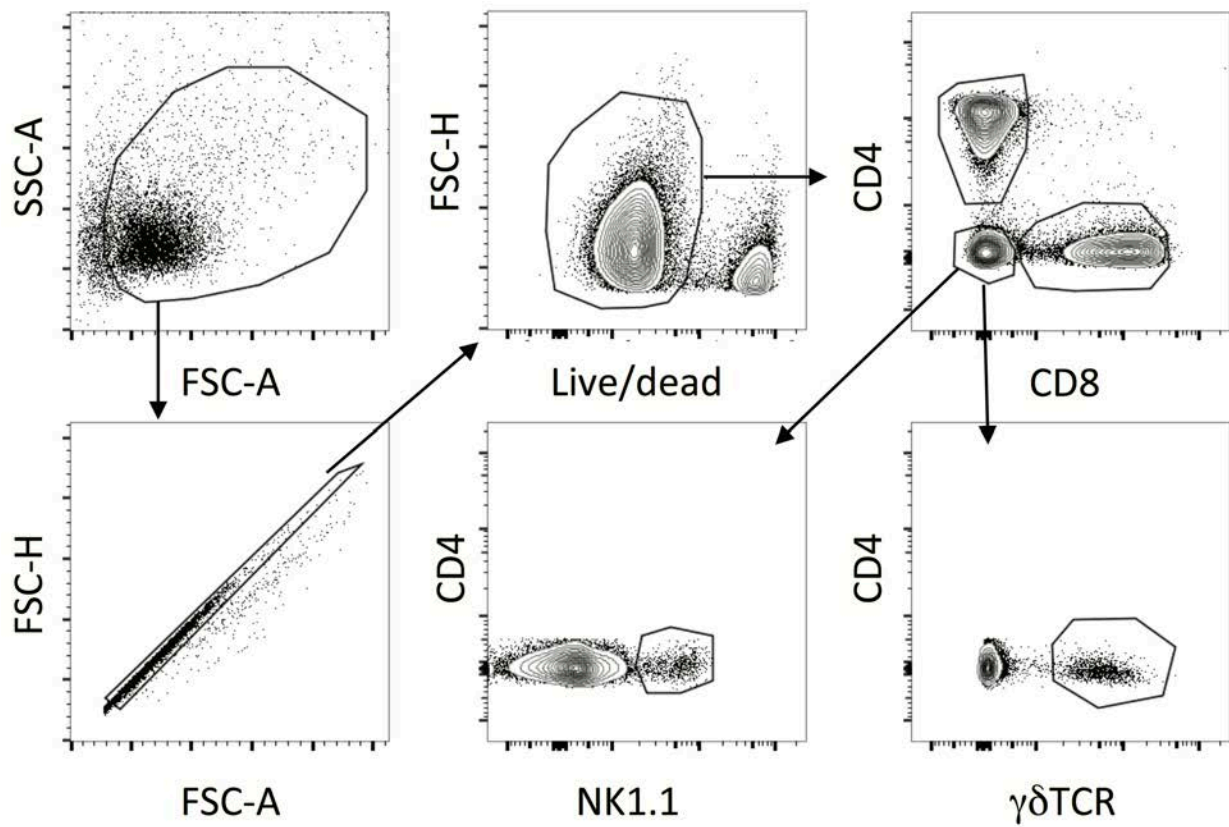

**Supplemental figure 4.** Gating strategy for flow cytometry analysis. Draining lymph nodes of 17D-204-infected mice were harvested at 3dpi. Single cell suspensions were prepared for flow cytometry analysis to identify cell types producing IFN- $\gamma$ . Singlet live cells were gated on CD4 and CD8. Single positive cells were identified as CD4<sup>+</sup> and CD8<sup>+</sup> T cells respectively. Double negative cells were further gated on NK1.1 and  $\gamma\delta$ TCR to identify NK cells and  $\gamma\delta$  T cells.

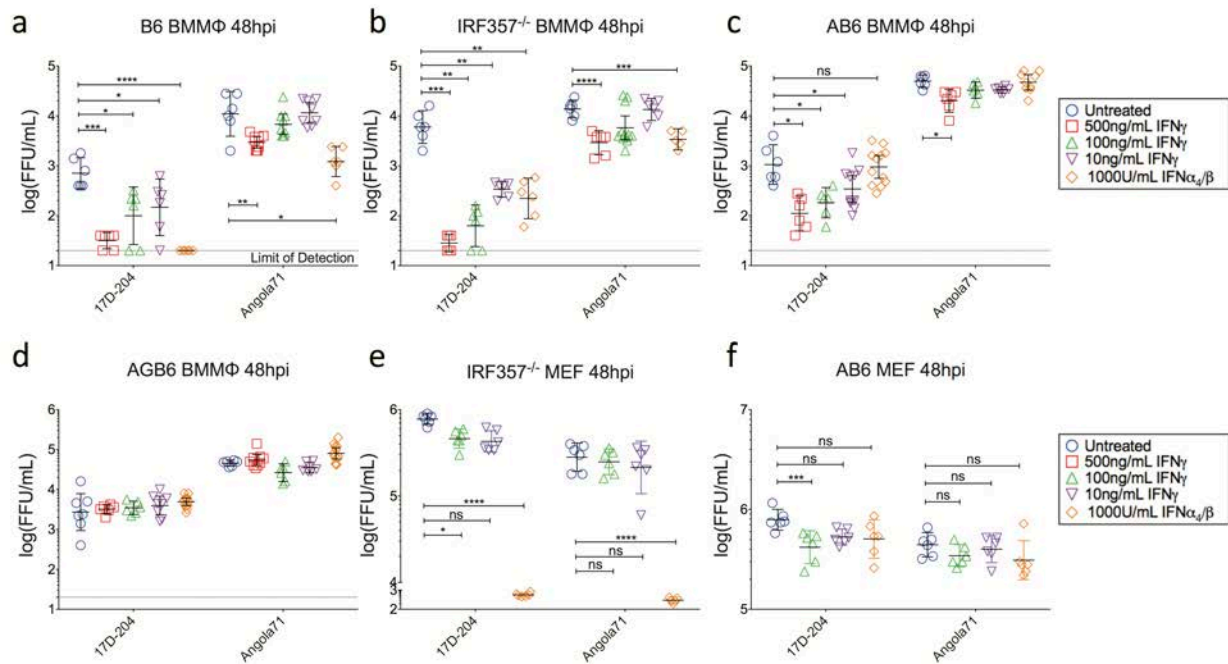

**Supplemental figure 5.** Robust dose-dependent inhibition of YFV by IFN- $\gamma$  in myeloid cells. Indicated cell types were treated with 1000IU/mL IFN- $\alpha_4/\beta$  or various concentrations of IFN- $\gamma$  12hrs prior to infection with 17D-204 or Angola71 at MOI=0.1. At 48hpi, supernatants were harvested and infectious virus particles were quantified by focus forming assay on Vero cells. (a-d) Bone marrow-derived macrophages and (e-f) mouse embryonic fibroblasts from various strains of mice. Foci titer data were presented in geometric mean  $\pm$  95% CI. Corresponding normalized data are presented in Fig. 5. (\*:  $p < 0.05$ , \*\*  $p < 0.01$ , \*\*\*  $p < 0.005$ , \*\*\*\*  $p < 0.001$ ; multiple t-test, corrected by Holm-Sidak method.)

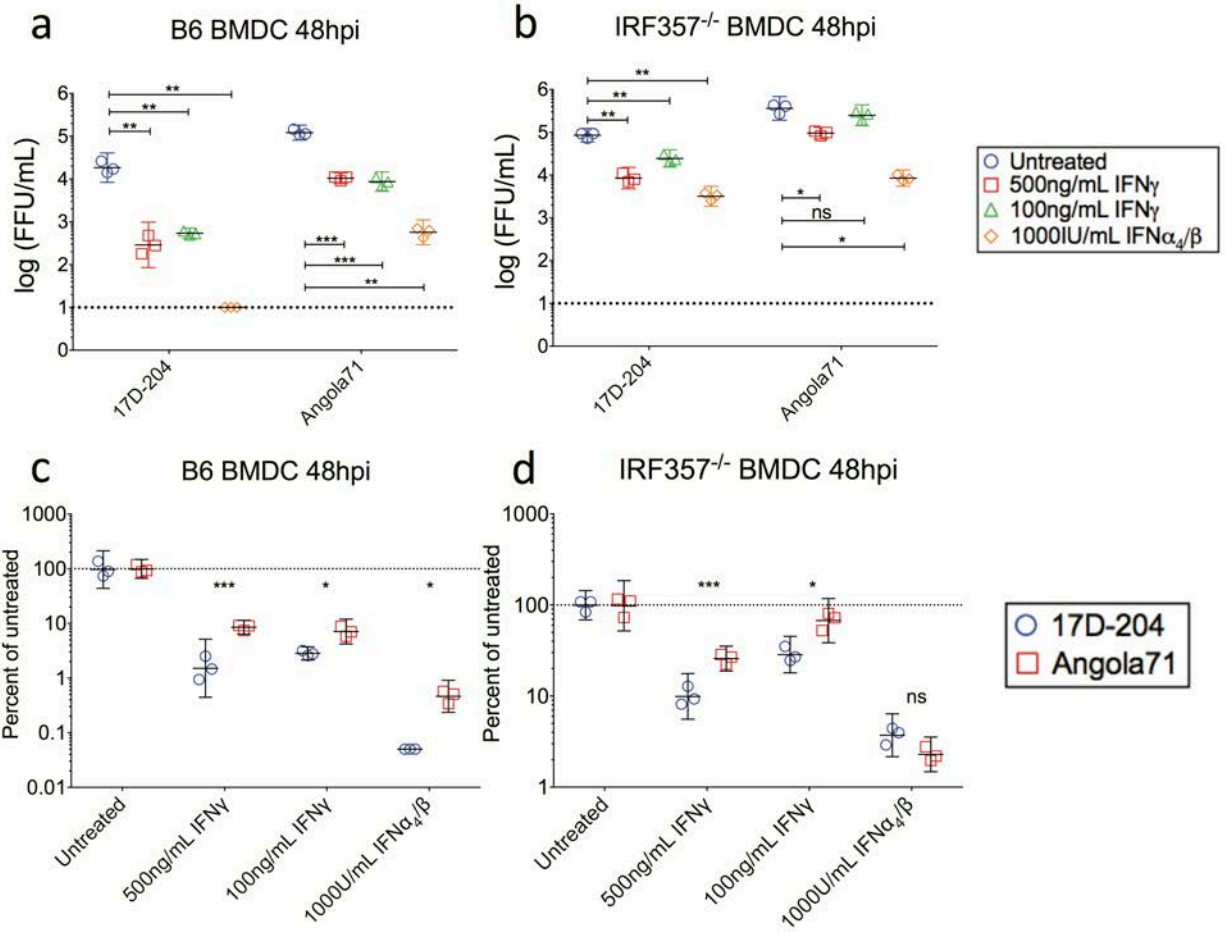

**Supplemental figure 6.** In dendritic cells, 17D-204 is more sensitive to IFN- $\gamma$ -induced antiviral states than wild-type strain Angola71. Indicated cell types were treated with 1000IU/mL IFN- $\alpha_4/\beta$  or various concentrations of IFN- $\gamma$  12hrs prior to infection with 17D-204 or Angola71 at MOI=1. At 48hpi, supernatants were harvested and infectious virus particles were quantified by focus forming assay on Vero cells. (a-b) Foci data were presented in geometric mean  $\pm$  95% CI (c-d) Foci data from corresponding experiments were normalized to untreated cells and presented in percentage, mean  $\pm$  SD. (\*:  $p < 0.05$ , \*\*  $p < 0.01$ , \*\*\*  $p < 0.005$ , \*\*\*\*  $p < 0.001$ ; multiple t-test, corrected by Holm-Sidak method.)

**Supplemental table 1:** Primer and probe sequences used in this study.

| Primer/probes     | Sequence                                                    |
|-------------------|-------------------------------------------------------------|
| 18S-S             | CGCCGCTAGAGGTGAAATTCT                                       |
| 18S-AS            | CGAACCTCCGACTTTCGTTCT                                       |
| 18S probe (HEX)   | /5HEX/CAA GAC GGA /ZEN/CCA GAG CGA AAG CAT TTG<br>/3IABkFQ/ |
| mIFIT1-S          | GTGGCTCACATAGAGCAGGA                                        |
| mIFIT1-AS         | AGTTTCCTCCAAGCAAAGGA                                        |
| mIFIT2-S          | AGAATTCACCTCTGGATGGG                                        |
| mIFIT2-AS         | GTCAAGCTTCAGTGCCAAGA                                        |
| mIGTP-S           | TCTGAGCAGGTTCTGAAGGA                                        |
| mIGTP-AS          | TCCTCGGCTTCTTTCTTCTC                                        |
| mIFN $\gamma$ -S  | CAAAAGGATGGTGACATGAA                                        |
| mIFN $\gamma$ -AS | TTGGCAATACTCATGAATGC                                        |
